# Supplementary material
Source: publisher figshare collection journal article supplement (https://karger.figshare.com/articles/dataset/_/18393857)
Supplement: Supplementary file 1 [file 1]

Evaluation of clinical diagnosis

☐ Barbro ☐ Björn

Article title: .....

Author: .....

PMID: .....

Type of study (e.g. case report): .....

The same case is found in the following article (case duplicate): .....

If written in a language other than English / Swedish / Norwegian / Danish, what language:  
.....

***If the language is other than English / Swedish / Norwegian / Danish, the form is filled in according to ability and saved to be mentioned in the review.***

Found via:

☐ The search string on Medline / Pubmed.

☐ Reference to .....

☐ Recommendation from other researcher, name: .....

☐ Other.....

Current eye diagnosis: .....

Borrelia species: .....

Borrelia found in (what tissue): .....

Diagnostic laboratory method: .....

Is there any obvious alternative explanation for the current eye condition that makes Borrelia infection as a cause of the eye condition completely unreasonable?

☐ No. ☐ Yes, because .....

Is there any other reason to consider that Borrelia infection as a cause of the eye condition would be completely unreasonable?

☐ No. ☐ Yes, because .....

Special comment on / objection to the execution of the study / results:

.....

☐ Approved by Leif

Changes?.....

.....
