# Supplementary material
Source: publisher figshare collection journal article supplement (https://karger.figshare.com/articles/dataset/_/18393857)
Supplement: Supplementary file 2 [file 1]

## EVALUATION OF LABORATORY DIAGNOSIS

**Study:**

**PubMed ID:**

**Laboratory method:**

1. On the choice of diagnostic microbiological laboratory method in relation to the individual case (disease state, tissue type, *Borrelia* suspicion, etc.):

☐ The method has no value at all in this situation, it cannot even give an indication of the presence of *Borrelia* in the tissue.

☐ The method can be expected (regarding diagnosis of *Borrelia* species) to reach the corresponding level of precision:

- ☐ Domain (bacterium)
- ☐ Phylum (spirochaetae)
- ☐ Class (spirochaetes)
- ☐ Order (spirochaetales)
- ☐ Family (Spirochaetaceae)
- ☐ Genus (*Borrelia*)
- ☐ Species (e.g. *B. Burgdorferi*, *B. Afzelii*)

☐ Other .....

2. What is the risk (generally speaking) of false positive / negative results with the method in question, given that it is performed correctly?

☐ Minimal. ☐ Moderate. ☐ High risk

3. Is there anything in the study's description of the diagnostic microbiological laboratory work that suggests a directly incorrect application of the chosen method?

☐ No. ☐ Yes, specifically .....

4. Is the description of the microbiological work sufficiently satisfactory to be able to assume that it has been carried out correctly?

☐ No. ☐ Yes

Comment: .....
